# Supplementary material
Source: HighWire-hosted journal article supplement (https://bmjopen.bmj.com/content/9/4/e025222)
Supplement: inline-supplementary-material-1 [file inline-supplementary-material-1.pdf]

### **Supplementary appendix 1. An example of the full search strategy**

Pubmed:

```
(((((CD11b[Title/Abstract]) OR Neutrophil CD11b[Title/Abstract]) OR nCD11b[Title/Abstract]))  
AND (((Infection[Title/Abstract]) OR (((((Sepsis[Title/Abstract]) OR Septicemia[Title/Abstract])  
OR Bacteremia[Title/Abstract]) OR Pyemia[Title/Abstract]) OR Pyohemia[Title/Abstract]) OR  
Pyemia[Title/Abstract]))) OR "Sepsis"[Mesh])) AND (("Infant, Newborn"[Mesh]) OR  
(((Newborn[Title/Abstract]) OR Neonate[Title/Abstract]) OR Neonatal[Title/Abstract]) OR  
Infant[Title/Abstract]))
```
