# Supplementary material
Source: HighWire-hosted journal article supplement (https://bmjopen.bmj.com/content/9/4/e025222)
Supplement: inline-supplementary-material-2 [file inline-supplementary-material-2.pdf]

**Table S1. Risk of bias and applicability concerns of included studies**

| Author     | Year | Risk of bias      |            |                    |                 | Applicability Concerns |            |                    |
|------------|------|-------------------|------------|--------------------|-----------------|------------------------|------------|--------------------|
|            |      | Patient Selection | Index Test | Reference Standard | Flow and Timing | Patient Selection      | Index Test | Reference Standard |
| Weirich E  | 1998 | LR                | LR         | LR                 | LR              | LC                     | LC         | LC                 |
| Cui YB     | 2003 | LR                | UR         | LR                 | LR              | LC                     | UC         | LC                 |
| Nupponen I | 2001 | LR                | UR         | LR                 | LR              | LC                     | UC         | LC                 |
| Genel F    | 2012 | UR                | UR         | LR                 | LR              | UC                     | UC         | LC                 |
| Adib M     | 2007 | UR                | UR         | LR                 | LR              | HC                     | UC         | LC                 |
| Du J       | 2014 | LR                | LR         | LR                 | LR              | LC                     | LC         | LC                 |
| Ng PC      | 2002 | UR                | UR         | LR                 | LR              | HC                     | UC         | LC                 |
| Turunen R  | 2005 | LR                | UR         | LR                 | LR              | LC                     | UC         | LC                 |
| Aydin M    | 2017 | LR                | UR         | LR                 | LR              | HC                     | UC         | LC                 |

LR, low risk; UR,unclear risk; LC, low concern; UC,unclear concern; HC, high concern.
