# Supplementary material
Source: HighWire-hosted journal article supplement (https://bmjopen.bmj.com/content/9/4/e025222)
Supplement: inline-supplementary-material-3 [file inline-supplementary-material-3.pdf]

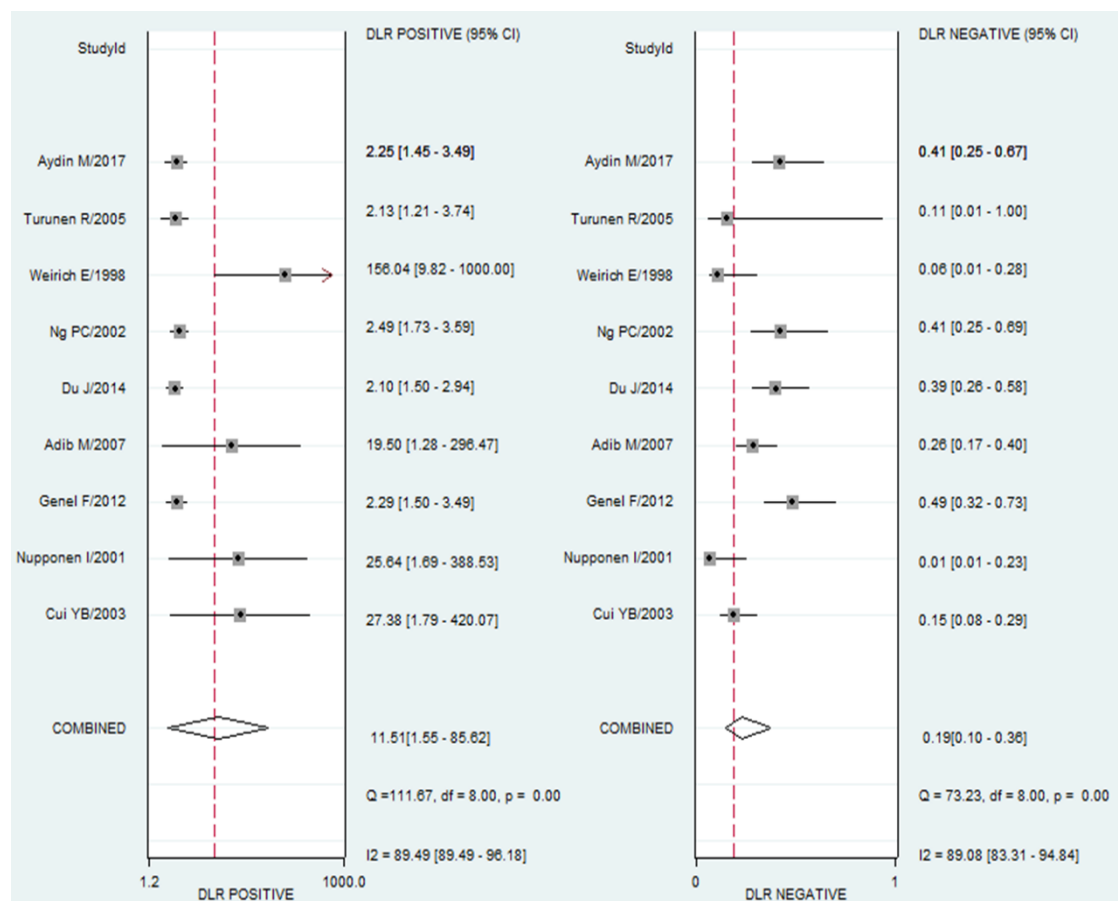

**Supplementary figure 1** The forest plots of positive likelihood ratio and negative likelihood ratio of nCD11b for neonatal sepsis diagnosis.

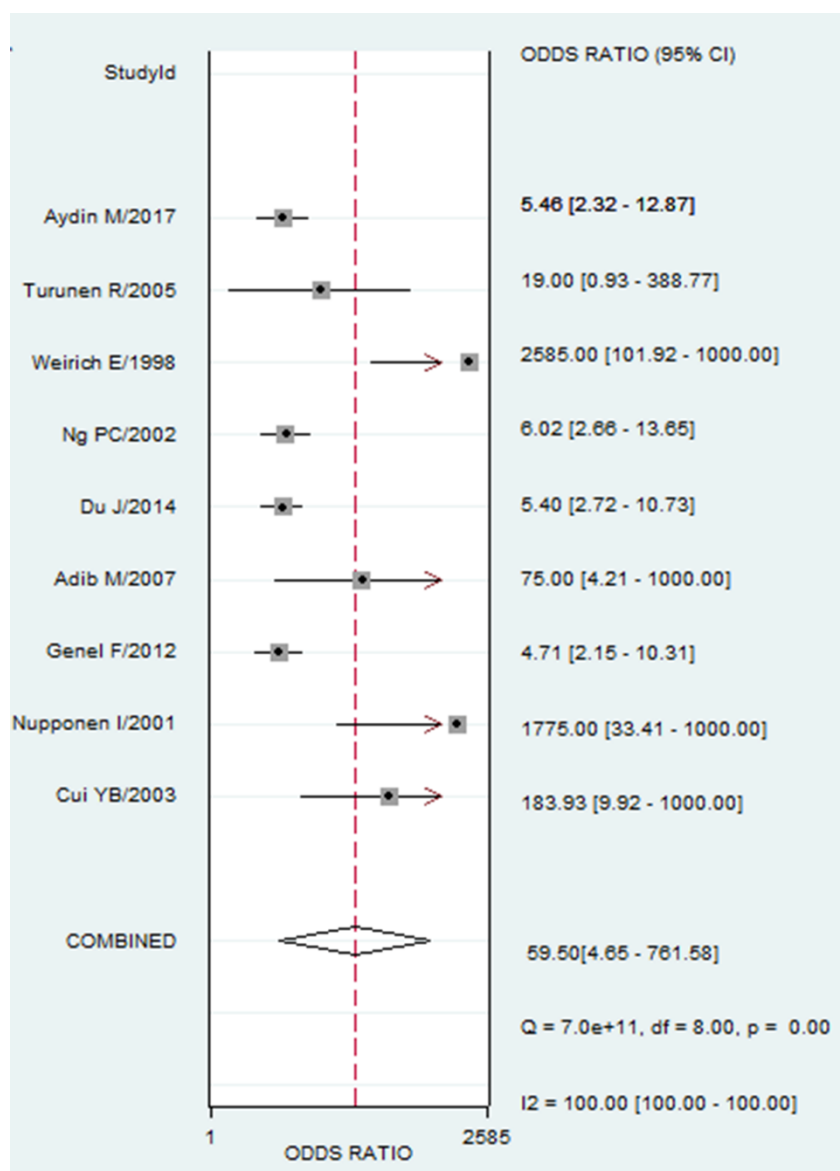

**Supplementary figure 2** The forest plots of diagnostic odds ratio of nCD11b to diagnose neonatal sepsis.

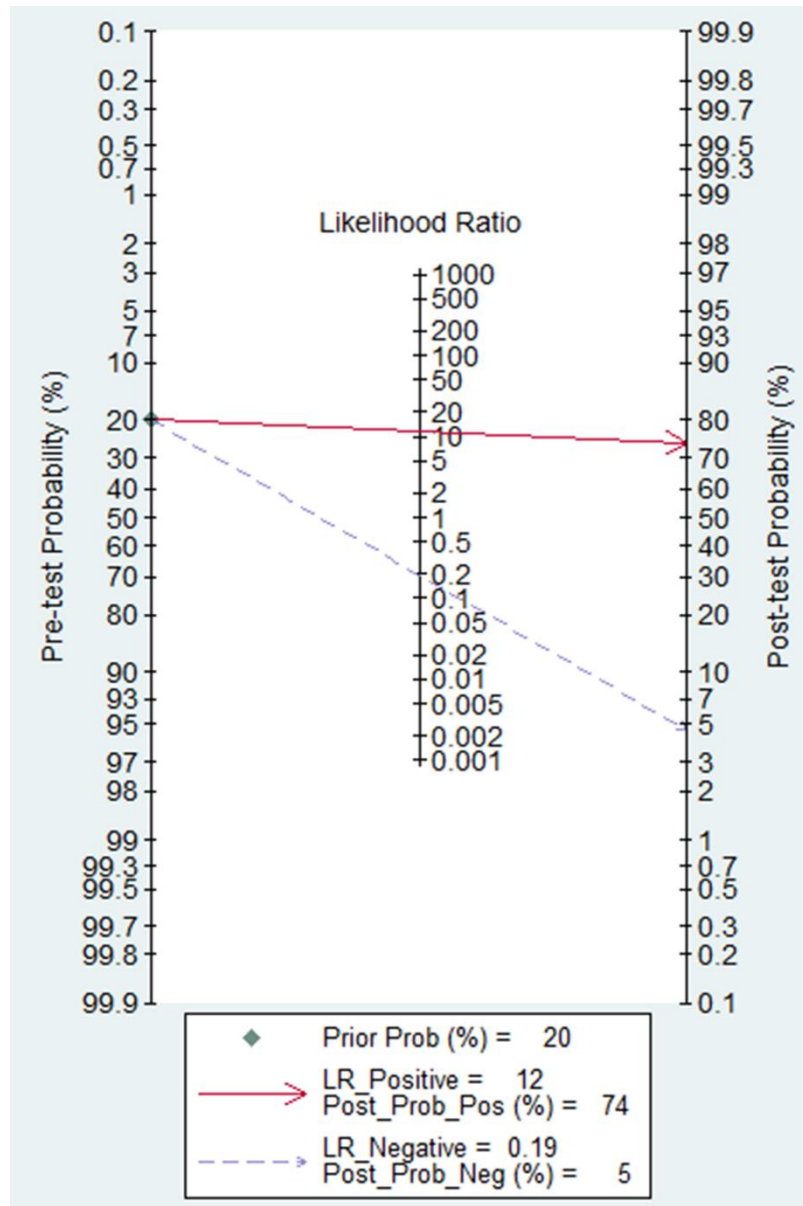

**Supplementary figure 3** The nomogram of pre-test and post probability of nCD11b for neonatal sepsis diagnosis.

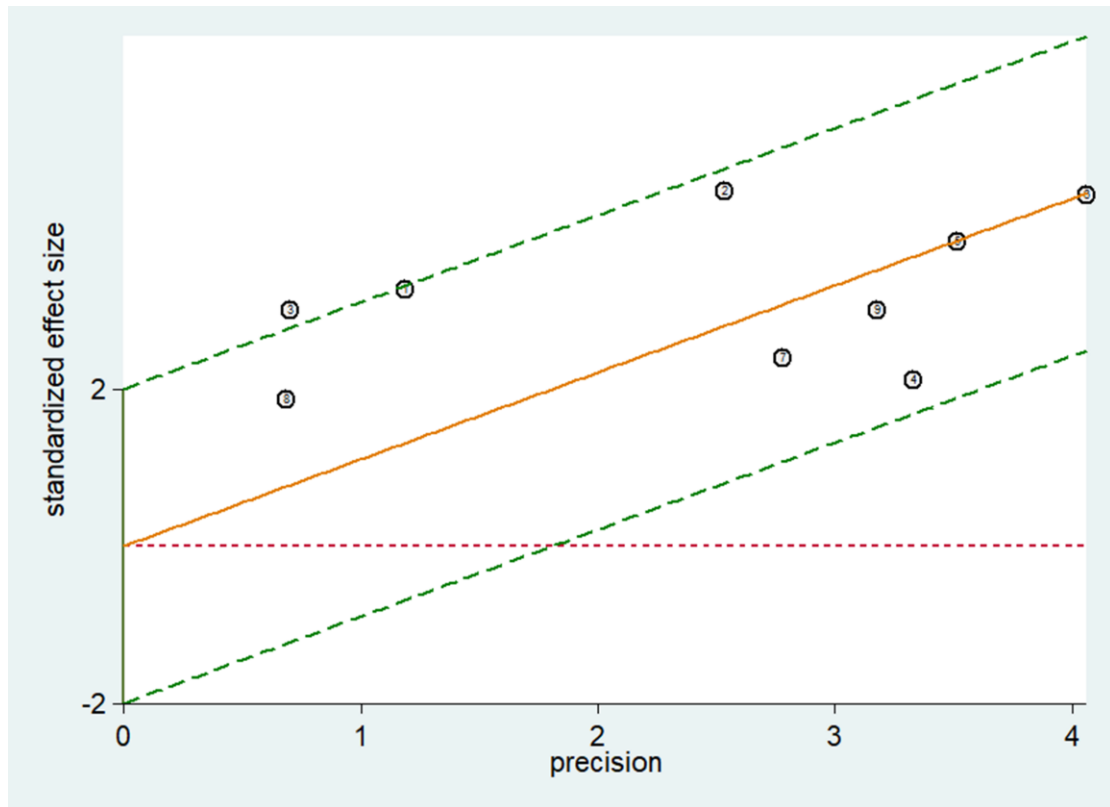

**Supplementary figure 4** Galbraith plot analysis of nCD11b for neonatal sepsis diagnosis.
